# Supplementary material for: Neuroblastoma Screening at 1 Year of Age: The Final Results of a Controlled Trial
Source: PubMed Central journal article supplement — JNCI Cancer Spectr. 2021 May 5;5(4):pkab041. doi: 10.1093/jncics/pkab041 (PMC8259619; doi:10.1093/jncics/pkab041), 2021-05-05
Supplement: pkab041_supplementary_data.pdf [file pkab041_supplementary_data.pdf]

# SUPPLEMENTARY MATERIAL

## Contents

Supplementary information on Methods (pages 2-3)

Definition of False negatives

Definition of Overdiagnosis

Definition of Toxic death

Definition of Incidental diagnosis

Acquisition of Clinical data

Supplementary Table 1 (page 4)

Cumulative incidence of the subcohorts control area, screening area non-participants and participants (all) and screening area participants only according to stage of neuroblastoma in the screening and control areas

Supplementary Table 2 (page 5)

Cumulative incidence of the subcohorts control area, screening area non-participants and participants (all) and screening area participants only according to stage of neuroblastoma in cases aged 12-23 months

Supplementary Table 3 (page 6)

Cumulative mortality 5 years after diagnosis according to stage of neuroblastoma in the screening and control areas during the study birth cohort, in the pre-study, and in the post-study birth cohorts

Supplementary Table 4 (page 7)

Average absolute number of 1382 neuroblastoma patients per birth year according to stage of neuroblastoma in the screening and control areas of the study cohort, in the pre-study, and in the post-study birth cohorts

Supplementary Table 5 (page 8)

Percent of neuroblastoma diagnoses without symptoms at clinical diagnosis per all neuroblastoma diagnoses per birth year

Supplementary Table 6 (page 9)

Average absolute number of tumor- and toxicity-related deaths per birth year in the screening and control areas of the study cohorts, in the pre-study, and in the post-study birth cohorts

Supplementary Figure 1 (page 10)

Kaplan-Meier estimates (EFS and OS) of 1382 neuroblastoma patients in the screening and control areas of the study cohorts, in the pre-study, and in the post-study birth cohorts

Supplementary Figure 2 (page 11-12)

Kaplan-Meier estimates (EFS and OS) of 1375 neuroblastoma patients according to stage in the screening and control areas of the study cohorts, in the pre-study, and in the post-study birth cohorts

Supplementary Figure 3 (page 13-14)

Outcome of patients with neuroblastoma aged 24-71 months at diagnosis comparing patients of the screening cohort and patients of the control cohort. Birth cohorts 1994-99

## **Supplementary Methods**

### **Definition of False negatives**

Patients with a negative screening result and clinical presentation of neuroblastoma up to 71 months were defined as false negative cases.

### **Definition of Overdiagnosis**

Overdiagnosis was defined as the excess incidence rate over the age window investigated (13<sup>th</sup> to 72<sup>nd</sup> month) comparing the participants to the control cohort and interpreted as the patients who would not have presented clinically because of spontaneous regression of the tumor, i.e. they were diagnosed unnecessarily. This was determined by subtracting the incidence rate of cases in the screened cohort minus those of the control area. Thus the determined excess is not explained by the early detection in the screening cohort.

### **Definition of Toxic death**

Death by toxicity was calculated only for patients who unequivocally died due to surgical, chemotherapeutic, or other therapies according to clinical reports. Cases in whom the cause remained unclear (tumor- and/or therapy related) were excluded in this analysis.

### **Definition of Incidental diagnosis**

The incidence rate of a diagnosis with a potential for overdiagnosis such as neuroblastoma can also increase through higher awareness and by incidental diagnoses. As a measure of disease awareness, we used the percentage of patients without any reported clinical symptoms. This percentage is typically high in Germany (17) due to the frequent routine health care check-ups in early childhood.

### **Acquisition of clinical data**

Cases were identified by the German Childhood Cancer Registry which receives information on all neuroblastoma cases in Germany and conducts an open-end, long-term vital status follow-up. Clinical data and follow-up data were obtained within the framework of the national neuroblastoma trials covering >97% of all German patients (17). The data lock was July 10, 2020.

### **Definition of event-free and overall survival**

Event-free survival (EFS) was defined as the time from the date of diagnosis until recurrence or progress or until death of any cause or until the last examination. Overall survival (OS) was calculated from the date of diagnosis until death of any cause or until the last examination.

## Supplementary Tables

### Supplementary Table 1

Cumulative incidence of the subcohorts control area, screening area non-participants and participants (all) and screening area participants only according to stage of neuroblastoma in the screening and control areas<sup>1</sup>

|                             | Study birth cohort<br>control area | Study birth cohort<br>screening area |                                |
|-----------------------------|------------------------------------|--------------------------------------|--------------------------------|
|                             | 1994-99                            | 1994-99<br>All births                | 1994-1999<br>Participants only |
| <b>Cumulative incidence</b> | Cases per 100,000 births (95%-CI)  |                                      |                                |
| Total                       | 9.3<br>(8.2-10.3)                  | 13.4 *<br>(12.2-14.6)                | 15.7 *<br>(14.0-17.4)          |
| Stage 1                     | 1.5<br>(1.0-1.9)                   | 3.6 *<br>(3.0-4.2)                   | 4.9 *<br>(3.9-5.8)             |
| Stage 2                     | 0.9<br>(0.5-1.2)                   | 2.3 *<br>(1.8-2.8)                   | 3.4 *<br>(2.6-4.2)             |
| Stage 3                     | 1.8<br>(1.3-2.3)                   | 2.3 *<br>(1.8-2.8)                   | 2.7 *<br>(2.0-3.4)             |
| Stages 1-3                  | 4.2<br>(3.5-4.9)                   | 8.3 *<br>(7.3-9.2)                   | 11.0 *<br>(9.5-12.4)           |
| Stage 4S                    | 0.0<br>(0.0-0.0)                   | 0.0<br>(0.0-0.0)                     | 0.0<br>(0.0-0.0)               |
| Stage 4                     | 5.0<br>(4.2-5.8)                   | 5.0<br>(4.3-5.7)                     | 4.4<br>(3.5-5.3)               |
| Stage missing               | 0.0<br>(0.0-0.1)                   | 0.2<br>(0.0-0.3)                     | 0.3<br>(0.0-0.5)               |

<sup>1</sup> Data include cases diagnosed at 12 to 71 months (2<sup>nd</sup>-6<sup>th</sup> year) of age

\* $P < 0.001$  comparing screening area all patients (detected by screening or clinically) or participants only (detected by screening) to the control area, respectively

**Supplementary Table 2**

Cumulative incidence of the subcohorts control area, screening area non-participants and participants (all) and screening area participants only according to stage of neuroblastoma in cases aged 12-23 months<sup>1</sup>

|                             | <b>Study birth cohort control area</b> | <b>Study birth cohort screening area</b> |                                |
|-----------------------------|----------------------------------------|------------------------------------------|--------------------------------|
| <b>Birth year</b>           | 1994-1999                              | 1994-1999<br>All births                  | 1994-1999<br>Participants only |
| <b>Cumulative incidence</b> | Cases per 100,000 births (95%-CI)      |                                          |                                |
| Total                       | 3.4<br>(2.8-4.1)                       | 8.3 *<br>(7.4-9.3)                       | 10.1 *<br>(8.7-11.4)           |
| Stage 1                     | 0.6<br>(0.3-0.9)                       | 3.0 *<br>(2.4-3.5)                       | 4.2 *<br>(3.3-5.0)             |
| Stage 2                     | 0.5<br>(0.2-0.8)                       | 2.0 *<br>(1.5-2.4)                       | 2.8 *<br>(2.0-3.5)             |
| Stage 3                     | 0.9<br>(0.5-1.2)                       | 1.5 *<br>(1.1-1.9)                       | 1.8 *<br>(1.2-1.7)             |
| Stage 1-3                   | 2.0<br>(1.5-2.5)                       | 6.4 *<br>(5.6-7.2)                       | 8.7 *<br>(7.4-9.9)             |
| Stage 4S                    | 0.0<br>(0.0-0.0)                       | 0.0<br>(0.0-0.0)                         | 0.0<br>(0.0-0.0)               |
| Stage 4                     | 1.5<br>(1.0-1.9)                       | 1.7<br>(1.3-2.2)                         | 1.2<br>(0.7-1.7)               |
| Stage missing               | 0.0<br>(0.0-0.0)                       | 0.2<br>(0.0-0.3)                         | 0.2<br>(0.0-0.4)               |

<sup>1</sup> 12-23 months (2<sup>nd</sup> year of life) is the typical age of true positive cases detected by the neuroblastoma screening

\*P<0.001 comparing all patients in the screening area (detected by screening or clinically) or screening participants only (detected by screening) to the control area, respectively

### **Supplementary Table 3**

Cumulative mortality 5 years after diagnosis according to stage of neuroblastoma in the screening and control areas during the study birth cohort, in the pre-study, and in the post-study birth cohorts<sup>1</sup>

|                                    | <b>Pre-study birth cohort</b>      | <b>Study birth cohort screening area</b> | <b>Study birth cohort control area</b> | <b>Post-study birth cohort</b> |                  |
|------------------------------------|------------------------------------|------------------------------------------|----------------------------------------|--------------------------------|------------------|
| <b>Birth year</b>                  | 1990-1993                          | 1994-1999                                | 1994-1999                              | 2000-2004                      | 2005-2009        |
| <b>Cumulative 5-year mortality</b> | deaths per 100,000 births (95%-CI) |                                          |                                        |                                |                  |
| Total                              | 3.2<br>(2.7-3.7)                   | 3.1 * **<br>(2.5-3.6)                    | 3.4 *<br>(2.7-4.0)                     | 2.9<br>(2.5-3.4)               | 2.4<br>(2.0-2.9) |
| Stage 1                            | 0.0<br>(0.0-0.1)                   | 0.2<br>(0.0-0.3)                         | 0.0<br>(0.0-0.0)                       | 0.0<br>(0.0-0.0)               | 0.0<br>(0.0-0.0) |
| Stage 2                            | 0.0<br>(0.0-0.0)                   | 0.1<br>(0.0-0.2)                         | 0.0<br>(0.0-0.1)                       | 0.1<br>(0.0-0.1)               | 0.0<br>(0.0-0.2) |
| Stage 3                            | 0.4<br>(0.2-0.5)                   | 0.3<br>(0.1-0.5)                         | 0.4<br>(0.2-0.6)                       | 0.3<br>(0.2-0.5)               | 0.0<br>(0.0-0.2) |
| Stage 1-3                          | 0.4<br>(0.2-0.6)                   | 0.6<br>(0.4-0.9)                         | 0.5<br>(0.2-0.7)                       | 0.4<br>(0.2-0.5)               | 0.2<br>(0.1-0.4) |
| Stage 4S                           | 0.0<br>(0.0-0.0)                   | 0.0<br>(0.0-0.0)                         | 0.0<br>(0.0-0.0)                       | 0.0<br>(0.0-0.0)               | 0.0<br>(0.0-0.1) |
| Stage 4                            | 2.7<br>(2.2-3.2)                   | 2.4<br>(1.9-2.9)                         | 2.9<br>(2.3-3.5)                       | 2.6<br>(2.1-3.0)               | 2.2<br>(1.7-2.6) |
| Stage missing                      | 0.1<br>(0.0-0.2)                   | 0.0<br>(0.0-0.0)                         | 0.0<br>(0.0-0.1)                       | 0.0<br>(0.0-0.0)               | 0.0<br>(0.0-0.1) |

<sup>1</sup> Data include cases diagnosed at 12 to 71 months (2<sup>nd</sup>-6<sup>th</sup> year) of age

\* $P=0.97$  testing the hypothesis that the birth cohort (1994-99, study and control area combined) is not different from all other time cohorts and areas, adjusted for age groups

\*\* $P=0.16$  testing the hypothesis that the study area (1994-99) is not different from all other birth cohorts and areas, adjusted for age groups

**Supplementary Table 4.** Average absolute number of 1382 neuroblastoma patients per birth year according to stage of neuroblastoma in the screening and control areas of the study cohort, in the pre-study, and in the post-study birth cohorts<sup>1</sup>

| Birth year                           | Pre-study birth cohort                  | Study birth cohort screening area | Study birth cohort control area | Post-study birth cohort |                     |                     |
|--------------------------------------|-----------------------------------------|-----------------------------------|---------------------------------|-------------------------|---------------------|---------------------|
|                                      | 1990-1993                               | 1994-1999                         | 1994-1999                       | 2000-2004               | 2005-2009           | 2010-2014           |
|                                      | <b>Average number of cases (95%-CI)</b> |                                   |                                 |                         |                     |                     |
| All stages                           | 63.3<br>(56.3-70.7)                     | 58.7<br>(53.4-64.2)               | 31.5<br>(27.5-35.9)             | 61.2<br>(55.2-67.6)     | 56.4<br>(50.6-62.6) | 51.0<br>(45.4-56.9) |
| Stage 1                              | 7.0<br>(4.8-9.9)                        | 16.3<br>(13.4-19.7)               | 5.0<br>(3.5-7.0)                | 7.2<br>(5.1-9.8)        | 7.4<br>(5.3-10)     | 4.6<br>(3-6.8)      |
| Stage 2                              | 6.5<br>(4.4-9.3)                        | 10.3<br>(8-13.1)                  | 2.8<br>(1.7-4.4)                | 6.0<br>(4.1-8.4)        | 6.8<br>(4.8-9.3)    | 8.6<br>(6.3-11.4)   |
| Stage 3                              | 11.8<br>(8.8-15.4)                      | 9.8<br>(7.6-12.5)                 | 6.2<br>(4.4-8.4)                | 10.2<br>(7.7-13.2)      | 8.6<br>(6.3-11.4)   | 8.2<br>(6-11)       |
| Stage 4S / multilocular <sup>2</sup> | 0<br>(0.0-0.0)                          | 0<br>(0.0-0.0)                    | 0<br>(0.0-0.0)                  | 0.4<br>(0.1-1.3)        | 1.0<br>(0.4-2.2)    | 0.8<br>(0.3-1.9)    |
| Stage 1-3                            | 25.3<br>(20.9-30.1)                     | 36.5<br>(32.5-40.7)               | 14.0<br>(11.4-17.0)             | 23.8<br>(20.1-28.2)     | 23.2<br>(19.5-27.3) | 22.0<br>(18.4-26.0) |
| Stage 4                              | 38.0<br>(32.5-44)                       | 22.2<br>(18.8-26)                 | 17.5<br>(14.5-20.9)             | 37.4<br>(32.6-42.7)     | 32.6<br>(28.1-37.6) | 28.8<br>(24.5-33.5) |
| Stage missing                        | 0<br>(0.0-0.0)                          | 0<br>(0.0-0.0)                    | 0<br>(0.0-0.0)                  | 0<br>(0.0-0.0)          | 0<br>(0.0-0.0)      | 0<br>(0.0-0.0)      |

<sup>1</sup> Data include cases diagnosed at 12 to 71 months (2<sup>nd</sup>-6<sup>th</sup> year) of age

<sup>2</sup> Stage 4S older than 1 year at diagnosis (12-18 months) applied only after 2000 according to modified inclusion criteria

**Supplementary Table 5**

Percent of neuroblastoma diagnoses without symptoms at clinical diagnosis per all neuroblastoma diagnoses per birth year <sup>1</sup>

| Birth year    | Pre-study birth cohort                    | Study birth cohort screening area | Study birth cohort control area | Study birth cohort Screening + control area | Post-study birth cohorts |                      |                      |
|---------------|-------------------------------------------|-----------------------------------|---------------------------------|---------------------------------------------|--------------------------|----------------------|----------------------|
|               | 1990-1993                                 | 1994-1999                         | 1994-1999                       | 1994-1999                                   | 2000-2004                | 2005-2009            | 2010-2014            |
|               | <b>Percent (95%-CI) of cases per year</b> |                                   |                                 |                                             |                          |                      |                      |
| All stages    | 15.8%<br>(11.7-20.7)                      | 53.4%<br>(48.2-58.6)              | 15.9%<br>(11.2-21.6)            | 40.3%<br>(36.2-44.5)                        | 17.0%<br>(13.1-21.5)     | 21.3%<br>(16.8-26.3) | 17.3%<br>(13-22.2)   |
| Stage 1-3     | 32.7%<br>(24.1-42.2)                      | 74.9%<br>(68.8-80.3)              | 32.1%<br>(22.9-42.6)            | 63.0%<br>(57.5-68.3)                        | 35.0%<br>(26.8-44.0)     | 40.4%<br>(31.7-49.5) | 22.4%<br>(15.3-31.0) |
| Stage 4S      | 0.0%<br>(0.0-0.0)                         | 0.0%<br>(0.0-0.0)                 | 0.0%<br>(0.0-0.0)               | 0.0%<br>(0.0-0.0)                           | 50%<br>(6.1-93.9)        | 20%<br>(2.3-62.9)    | 50%<br>(12.3-87.7)   |
| Stage 4       | 4.6%<br>(2.1-8.8)                         | 18.0%<br>(12.2-25.2)              | 2.9%<br>(0.8-7.4)               | 11.3%<br>(7.8-15.8)                         | 5.3%<br>(2.8-9.3)        | 8.0%<br>(4.5-12.9)   | 12.5%<br>(7.9-18.6)  |
| Stage missing | 0.0%<br>(0.0-0.0)                         | 0.0%<br>(0.0-0.0)                 | 0.0%<br>(0.0-0.0)               | 0.0%<br>(0.0-0.0)                           | 0.0%<br>(0.0-0.0)        | 0.0%<br>(0.0-0.0)    | 0.0%<br>(0.0-0.0)    |

<sup>1</sup> Data include cases diagnosed at 12 to 71 months (2<sup>nd</sup>-6<sup>th</sup> year) of age



### **Supplementary Table 6**

Average absolute number of tumor- and toxicity-related deaths per birth year in the screening and control areas of the study cohorts, in the pre-study, and in the post-study birth cohorts<sup>1</sup>

|                      | <b>Pre-study birth cohort</b>            | <b>Study birth cohort screening area</b> | <b>Study birth cohort control area</b> | <b>Post-study birth cohort</b> |                     |                        |
|----------------------|------------------------------------------|------------------------------------------|----------------------------------------|--------------------------------|---------------------|------------------------|
| <b>Birth year</b>    | 1990-1993                                | 1994-1999                                | 1994-1999                              | 2000-2004                      | 2005-2009           | 2010-2014 <sup>2</sup> |
|                      | <b>Average number of deaths (95%-CI)</b> |                                          |                                        |                                |                     |                        |
| All stages           |                                          |                                          |                                        |                                |                     |                        |
| By tumor             | 20.5<br>(16.7-24.9)                      | 13.5<br>(11.0-16.4)                      | 11.8<br>(9.4-14.6)                     | 22.6<br>(19.0-26.5)            | 17.0<br>(13.9-20.5) | 12.4<br>(9.7-15.5)     |
| By tumor or toxicity | 1.3<br>(0.5-2.7)                         | 0.5<br>(0.1-1.3)                         | 0.5<br>(0.1-1.3)                       | 0.6<br>(0.2-1.6)               | 0.8<br>(0.3-1.9)    | 0<br>(0-0)             |
| By toxicity          | 5.0<br>(3.2-7.5)                         | 1.8<br>(1-3.1)                           | 0.7<br>(0.2-1.6)                       | 1.2<br>(0.5-2.5)               | 2.0<br>(1-3.5)      | 2.0<br>(1-3.5)         |
| Stages 1-3           |                                          |                                          |                                        |                                |                     |                        |
| By tumor             | 1.3<br>(0.5-2.7)                         | 2.0<br>(1.1-3.4)                         | 1.7<br>(0.9-2.9)                       | 2.8<br>(1.6-4.5)               | 1.6<br>(0.8-3.0)    | 2<br>(1.0-3.5)         |
| By tumor or toxicity | 0.3<br>(0.0-1.2)                         | 0.2<br>(0.0-0.8)                         | 0<br>(0-0)                             | 0.2<br>(0.0-0.9)               | 0<br>(0-0)          | 0<br>(0-0)             |
| By toxicity          | 1.3<br>(0.5-2.7)                         | 0.7<br>(0.2-1.6)                         | 0.0<br>(0-0)                           | 0.4<br>(0.1-1.3)               | 0.2<br>(0-0.9)      | 0.2<br>(0-0.9)         |

<sup>1</sup> Data include cases diagnosed at 12 to 71 months (2<sup>nd</sup>-6<sup>th</sup> year) of age

<sup>2</sup> Observation period still incomplete. Data lock October 16<sup>th</sup>, 2020.

# Supplementary Figures

## Supplementary Figure 1

Kaplan-Meier estimates (EFS and OS) of 1382 neuroblastoma patients in the screening and control areas of the study cohorts, in the pre-study, and in the post-study birth cohorts<sup>1</sup>

A EFS of all stages aged 12-71 months at diagnosis

B OS of all stages aged 12-71 months at diagnosis

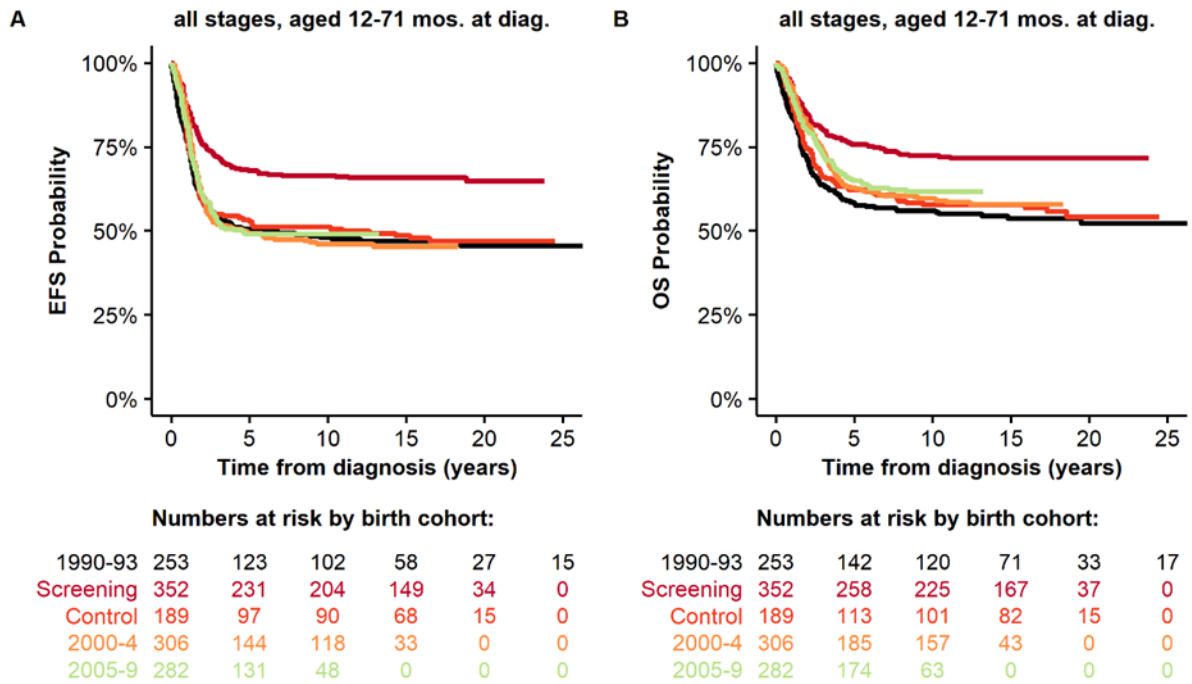

| Cohort                               | A                     | B                     |
|--------------------------------------|-----------------------|-----------------------|
|                                      | 10-y EFS (95%-CI)     | 10-y OS (95%-CI)      |
| Pre-study 1990-93 (N=253)            | 48.0% (43.6% - 54.4%) | 55.9% (49.7% - 62.1%) |
| Study Screening area 1994-99 (N=352) | 66.5% (64.5% - 71.5%) | 72.3% (67.5% - 77.1%) |
| Study Control area 1994-99 (N=189)   | 51.1% (43.7% - 58.5%) | 57.7% (50.5% - 64.9%) |
| Post-study:2000-4 (N=306)            | 56% (40.2% - 61.8%)   | 59.7% (54.1% - 65.3%) |
| Post-study 2005-9 (N=282)            | 49.1% (43.1% - 55.1%) | 61.6% (55.6% - 67.6%) |

**Supplementary Figure 2**

Kaplan-Meier estimates (EFS and OS) of 1375 neuroblastoma patients according to stage in the screening and control areas of the study cohorts, in the pre-study, and in the post-study birth cohorts<sup>1</sup>

A EFS of stages 1-3 aged 12-71 months at diagnosis

B OS of stages 1-3 aged 12-71 months at diagnosis

C EFS of stage 4 aged 12-71 months at diagnosis

D OS of stage 4 aged 12-71 months at diagnosis

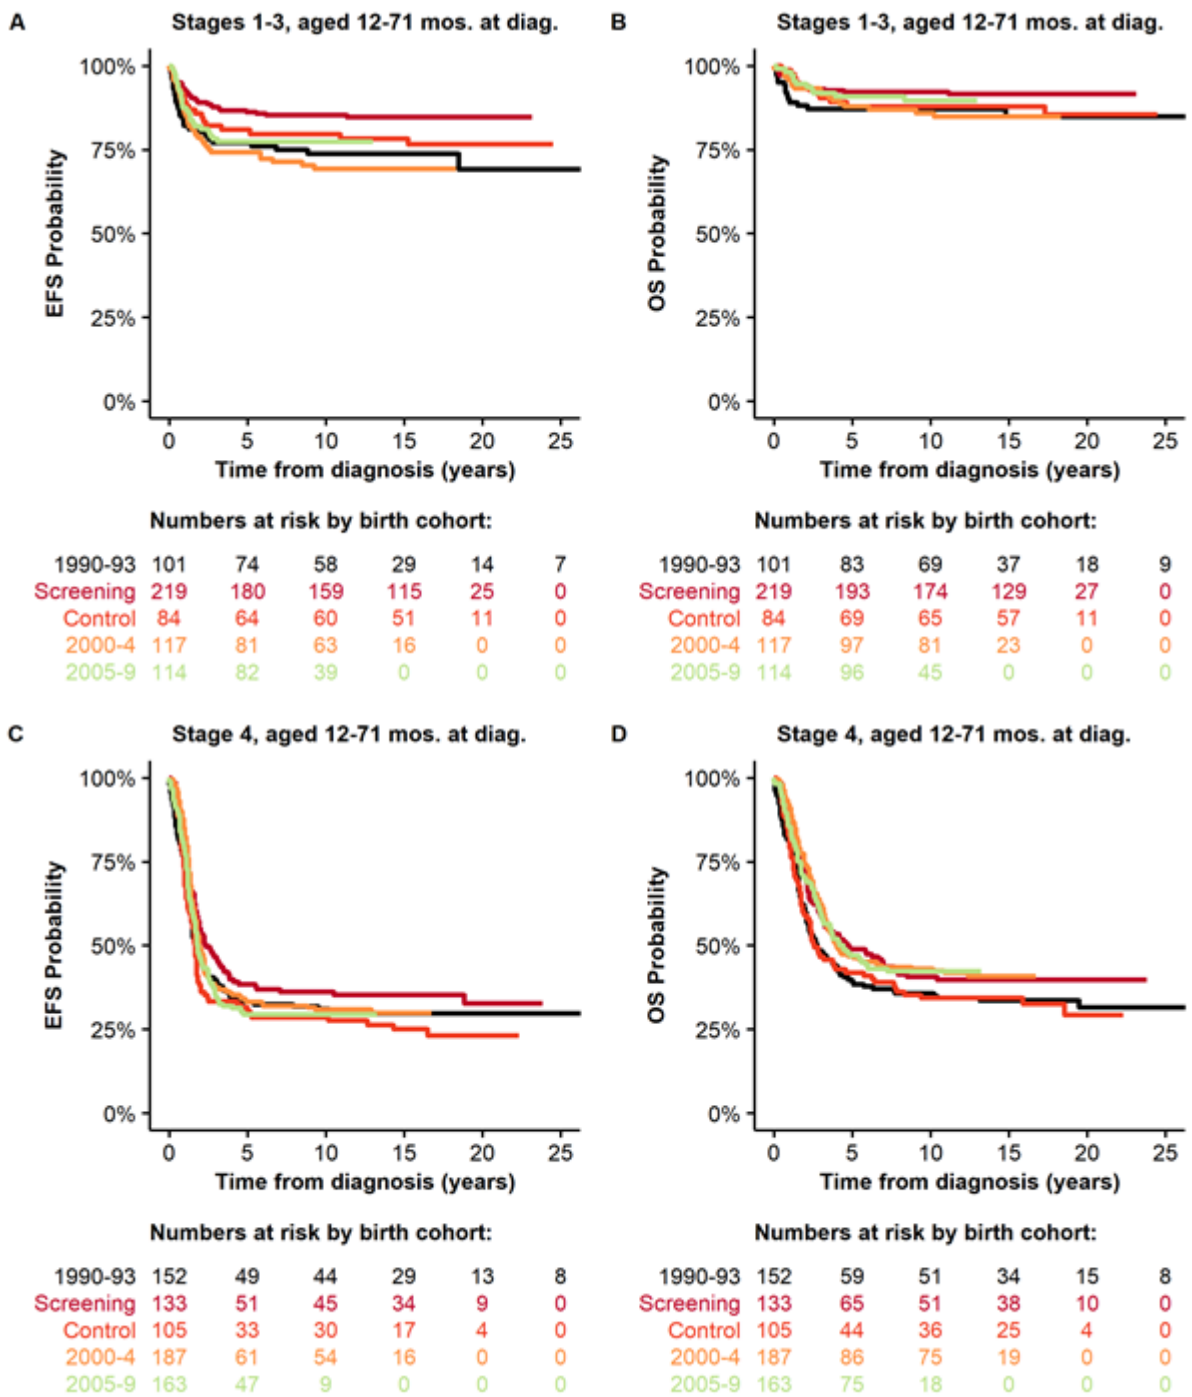

| Cohort                               | A                     | B                     |
|--------------------------------------|-----------------------|-----------------------|
| Stages 1-3                           | 10-y EFS (95%-CI)     | 10-y OS (95%-CI)      |
| Pre-study 1990-93 (N=101)            | 73.8% (65.0% - 82.6%) | 87.1% (80.5% - 93.7%) |
| Study screening area 1994-99 (N=219) | 85.2% (80.4% - 90.0%) | 92.2% (88.6% - 95.8%) |
| Study control area 1994-99 (N=84)    | 79.6% (70.8% - 88.4%) | 87.8% (80.6% - 95.0%) |
| Post-study 2000-4 (N=117)            | 69.3% (60.5% - 78.1%) | 85.9% (79.3% - 92.5%) |
| Post-study 2005-9 (N=114)            | 77.3% (69.3% - 85.3%) | 89.6% (83.6% - 95.6%) |
|                                      | C                     | D                     |
| Stage 4                              | 10-y EFS (95% CI)     | 10-y OS (95% CI)      |
| Pre-study 1990-93 (N=152)            | 31.1% (23.5% - 38.7%) | 35.7% (27.9% - 43.5%) |
| Study screening area 1994-99 (N=133) | 36.1% (27.7% - 44.5%) | 40.6% (32% - 49.2%)   |
| Study control area 1994-99 (N=105)   | 28.6% (19.8% - 37.4%) | 34.3% (25.1% - 43.5%) |
| Post-study 2000-4 (N=187)            | 30.9% (24.1% - 37.7%) | 43% (35.8% - 50.2%)   |
| Post-study 2005-9 (N=163)            | 29.5% (22.3% - 36.7%) | 42.2% (34.4% - 50%)   |

### Supplementary Figure 3

Outcome of patients with neuroblastoma aged 24-71 months at diagnosis comparing patients of the screening cohort and patients of the control cohort. Birth cohorts 1994-99.<sup>1</sup>

A EFS all patients (N=188)

B OS all patients (N=188)

C EFS stage 4 patients (N=115)

D OS stage 4 patients (N=115)

E EFS stage 3 patients (N=33)

F OS stage 3 (N=33)

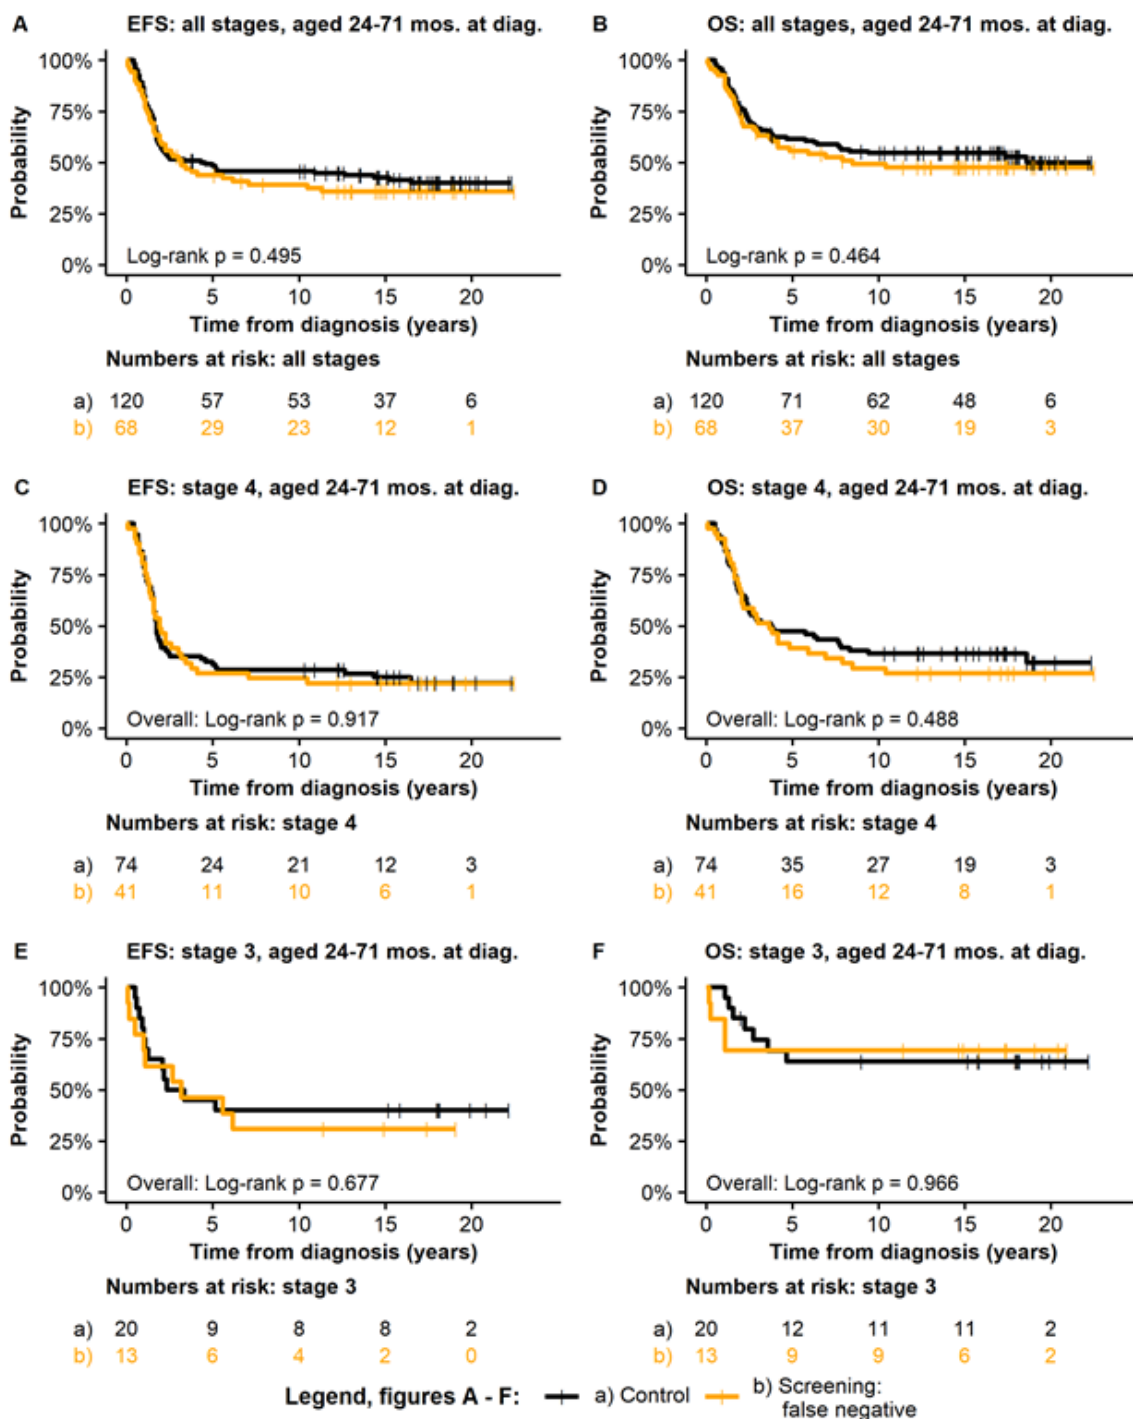

<sup>1</sup> Patients with true positive screening result are absent due to the screening period

| Study birth cohort 1994-99 aged 24 – 71 months at diagnosis |                       |                          |                          |
|-------------------------------------------------------------|-----------------------|--------------------------|--------------------------|
| Figure                                                      |                       | A                        | B                        |
| All stages (N=188)                                          |                       | 10-y EFS (95%-CI)        | 10-y OS (95%-CI)         |
| Control area (N=120)                                        |                       | 45.7%<br>(37.5% - 55.5%) | 54.5%<br>(46.2% - 64.3%) |
| Screening area (N=68)                                       | True positive (N=0)   | -                        | -                        |
|                                                             | False negative (N=68) | 39.1%<br>(29% - 52.8%)   | 49.3%<br>(38.6% - 62.9%) |
| Figure                                                      |                       | C                        | D                        |
| Stage 4 (N=115)                                             |                       | 10-y EFS (95% CI)        | 10-y OS (95% CI)         |
| Control area (N=74)                                         |                       | 28.4%<br>(14.2% - 41.8%) | 36.5%<br>(27.0% - 49.3%) |
| Screening area (N=41)                                       | True positive (N=0)   | -                        | -                        |
|                                                             | False negative (N=41) | 24.4%<br>(12.4% - 42.0%) | 29.3%<br>(18.2% - 47.1%) |
| Figure                                                      |                       | E                        | F                        |
| Stage 3 (N=33)                                              |                       | 10-y EFS (95% CI)        | 10-y OS (95% CI)         |
| Control area (N=20)                                         |                       | 40%<br>(23.4% - 68.4%)   | 63.7%<br>(45.5% - 89.3%) |
| Screening area (N=13)                                       | Positive (N=0)        | -                        | -                        |
|                                                             | False negative (N=13) | 30.8%<br>(13.6% - 69.5%) | 69.2%<br>(48.2% - 99.5%) |
